# Supplementary material for: Moisture-induced ionovoltaic electricity generation using lead free 2-dimensional Cs3SbBiBr9 perovskite
Source: Royal Society of Chemistry journal article supplement (doi:10.1039/d4se00997e), 2024-01-01
Supplement: d4se00997e1.pdf [file d4se00997e1.pdf]

## Supporting Information

### Moisture-Induced Ionovoltaic Electricity Generation Using Lead Free 2-Dimensional $\text{Cs}_3\text{SbBiBr}_9$ Perovskite

Ashna K. Pramod <sup>a, b</sup>, Sudip K. Batabyal <sup>a, b\*</sup>

<sup>a</sup> Department of Physics, Amrita School of Physical Sciences, Coimbatore, Amrita Vishwa Vidyapeetham, India

<sup>b</sup> Amrita Center for Industrial Research & Innovation (ACIRI), Amrita School of Engineering, Coimbatore, Amrita Vishwa Vidyapeetham, India.

Corresponding Author Email: \* [s\\_batabyal@cb.amrita.edu](mailto:s_batabyal@cb.amrita.edu)

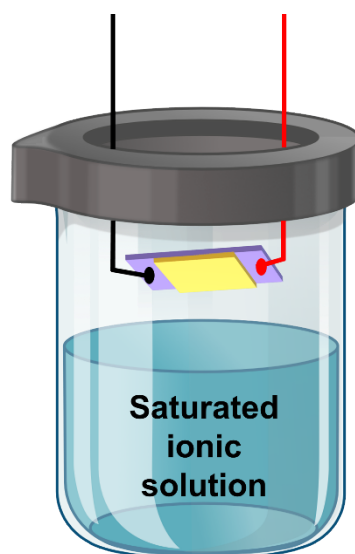

Fig.S1: Schematic representation of  $\text{Cs}_3\text{SbBiBr}_9$  ionovoltaic device measurement setup

Table 1. Calculated lattice parameters of the lead-free perovskite powders  $\text{Cs}_3\text{Sb}_2\text{Br}_9$ ,  $\text{Cs}_3\text{Bi}_2\text{Br}_9$  and  $\text{Cs}_3\text{SbBiBr}_9$

| Perovskite                          | Lattice parameters |      |      |                  |      |      |
|-------------------------------------|--------------------|------|------|------------------|------|------|
|                                     | Theoretical (Å)    |      |      | Experimental (Å) |      |      |
|                                     | a                  | b    | c    | a                | b    | c    |
| $\text{Cs}_3\text{Bi}_2\text{Br}_9$ | 7.97               | 7.97 | 9.86 | 8.03             | 8.03 | 9.67 |
| $\text{Cs}_3\text{Sb}_2\text{Br}_9$ | 7.93               | 7.93 | 9.71 | 7.92             | 7.92 | 9.74 |

|                              |      |      |      |      |      |      |
|------------------------------|------|------|------|------|------|------|
| $\text{Cs}_3\text{SbBiBr}_9$ | 7.93 | 7.93 | 9.71 | 7.91 | 7.90 | 9.73 |
|------------------------------|------|------|------|------|------|------|

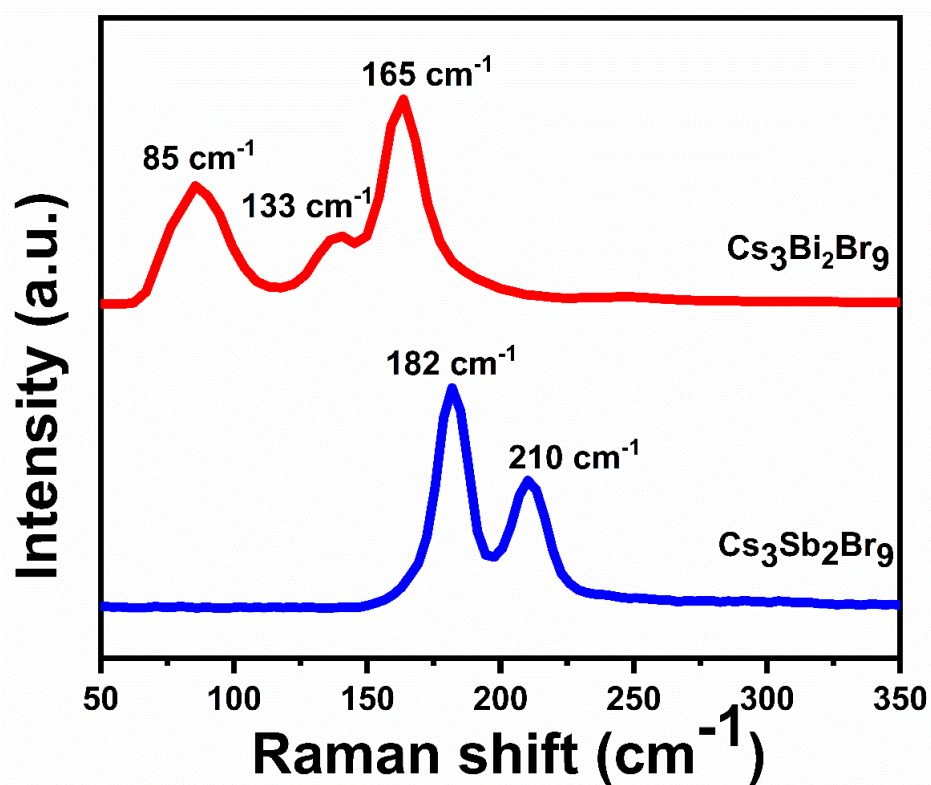

Fig.S2: Raman spectra of  $\text{Cs}_3\text{Sb}_2\text{Br}_9$  and  $\text{Cs}_3\text{Bi}_2\text{Br}_9$

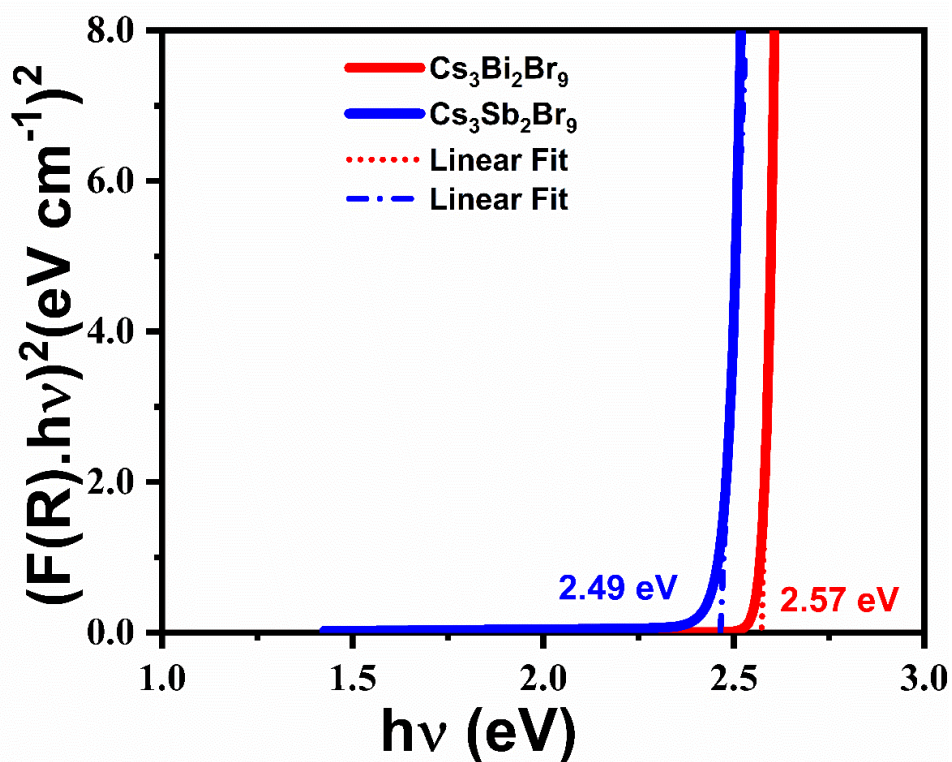

**Fig.S3: Band gap of  $\text{Cs}_3\text{Sb}_2\text{Br}_9$  and  $\text{Cs}_3\text{Bi}_2\text{Br}_9$**

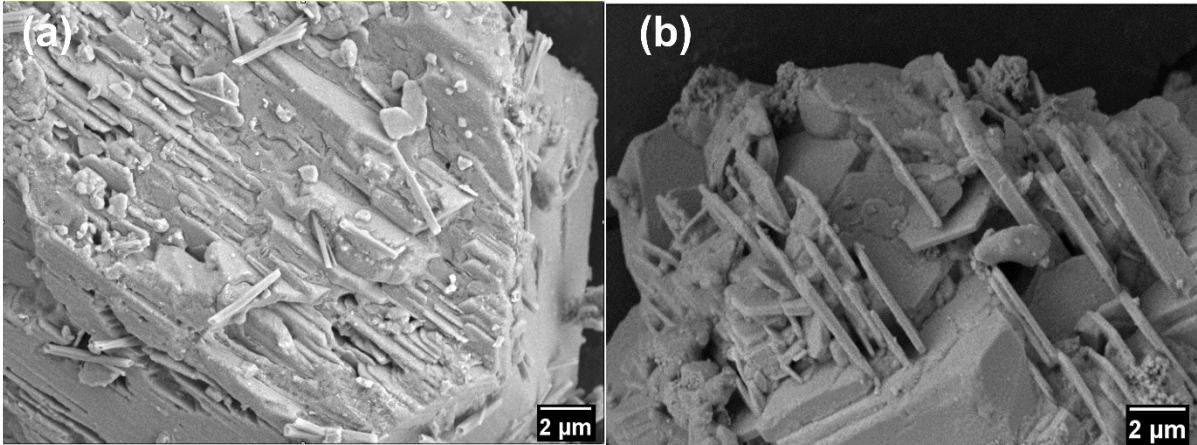

**Fig.S4: SEM image of pristine  $\text{Cs}_3\text{SbBiBr}_9$  thick blocks with layered structure**

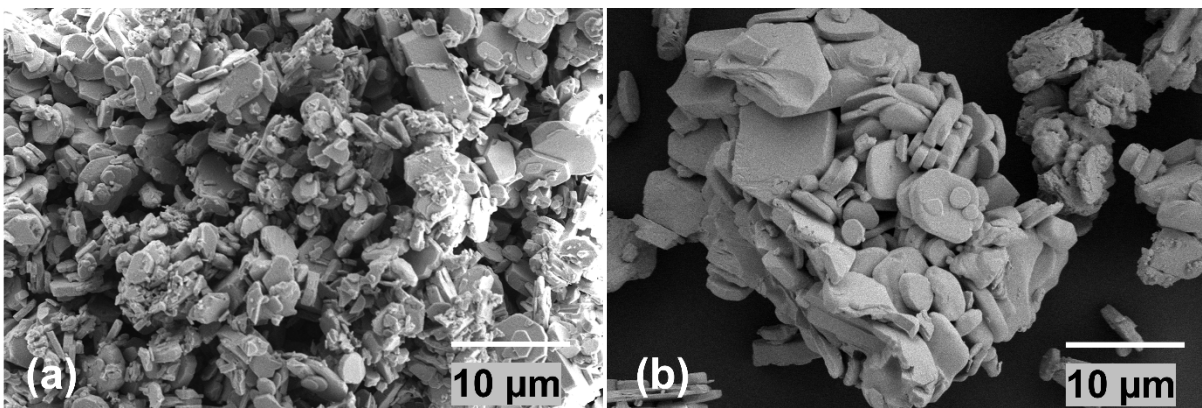

**Fig.S5: (a) SEM image of lead -free perovskite  $\text{Cs}_3\text{Sb}_2\text{Br}_9$  powder; (b) SEM image of lead -free perovskite  $\text{Cs}_3\text{Bi}_2\text{Br}_9$  powder hexagonal morphology**



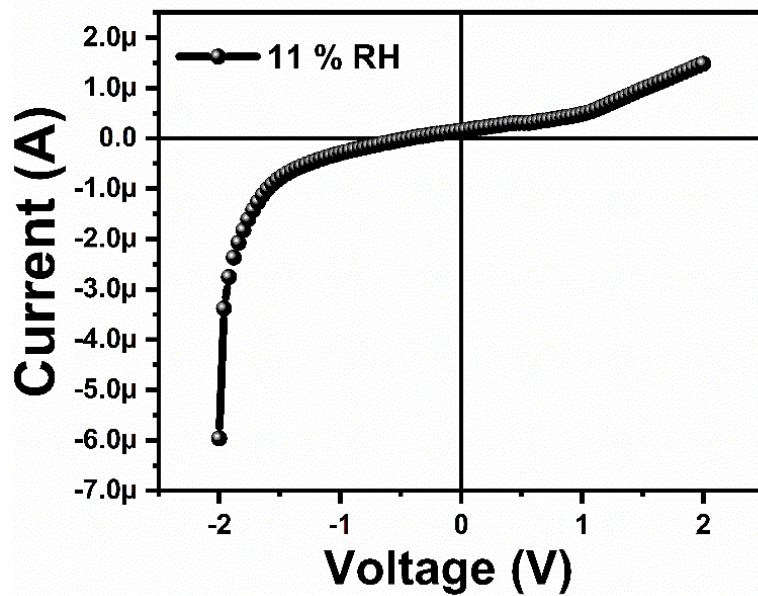

Fig.S6: Zoomed in view of the I-V curve at 11 % RH

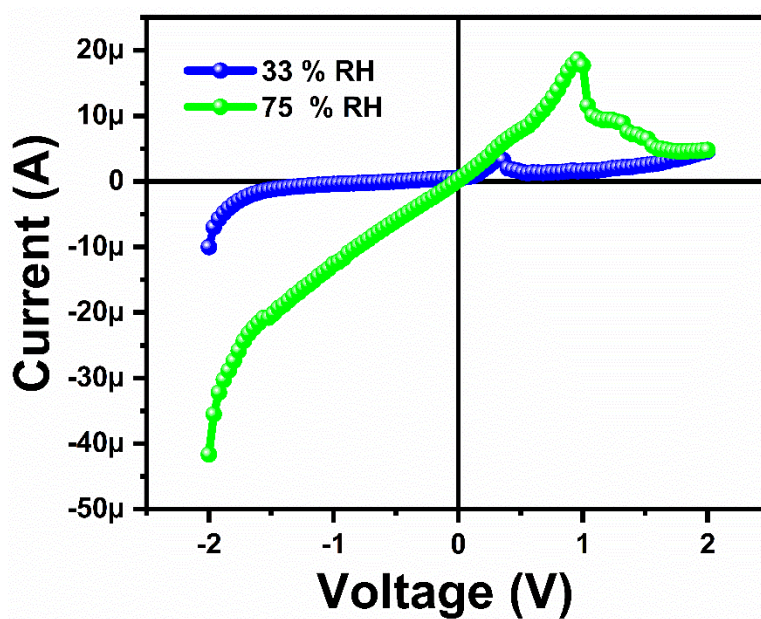

Fig.S7: Current-voltage curves measured at 33 % and 75 % RH

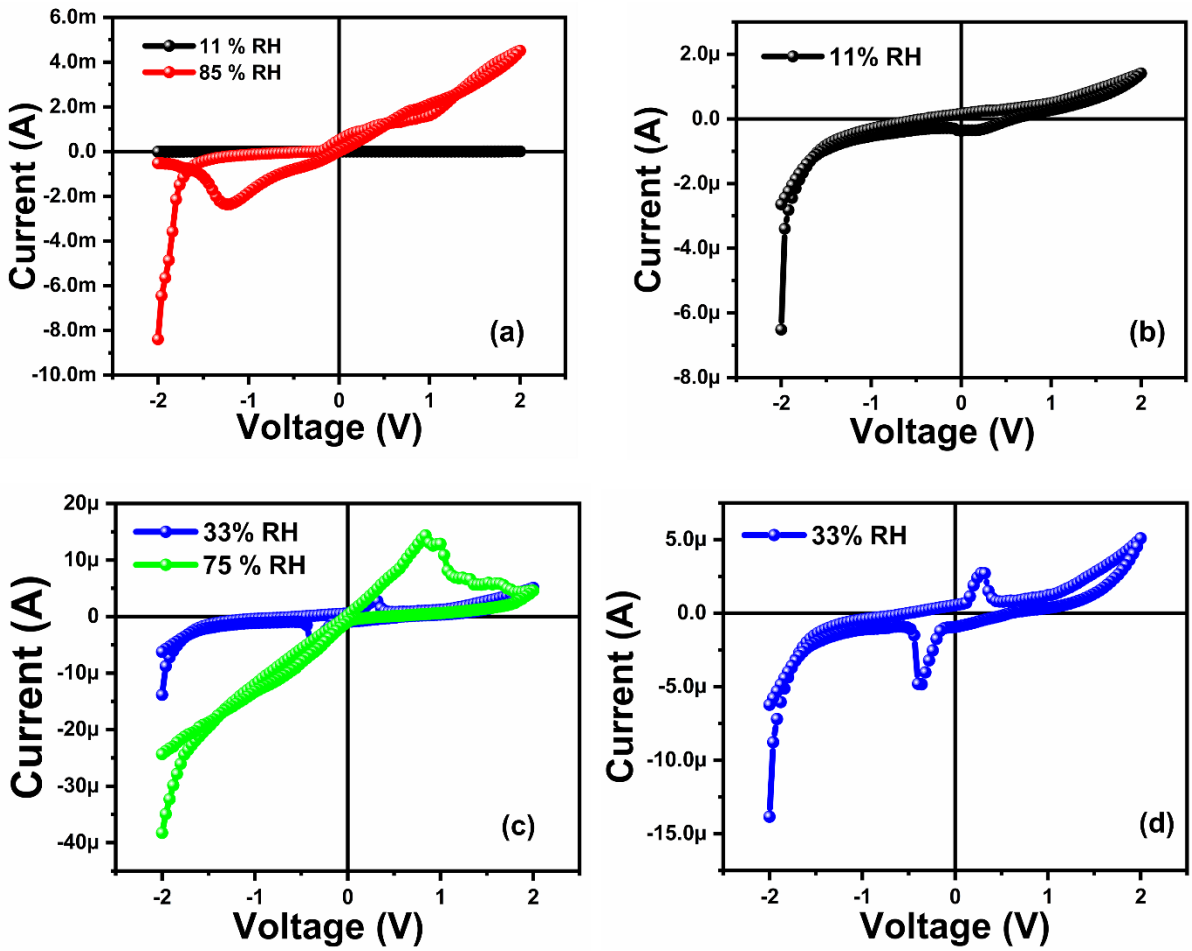

Fig.S8: I-V loop demonstrating energy storage behavior;(a) I-V loop at 11and 85% RH;  
 (b) Zoomed in view of the I-V loop curve at 11 % RH;(c) I-V loop at 33 and 75% RH;  
 (b) Zoomed in view of the I-V loop curve at 33 % RH

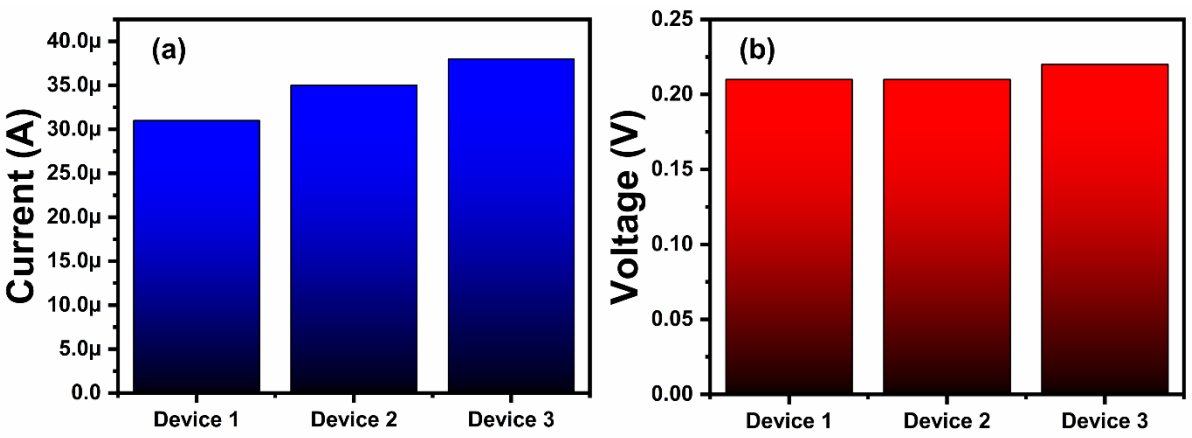

Fig.S9: Statistical data for three ionovoltaic devices

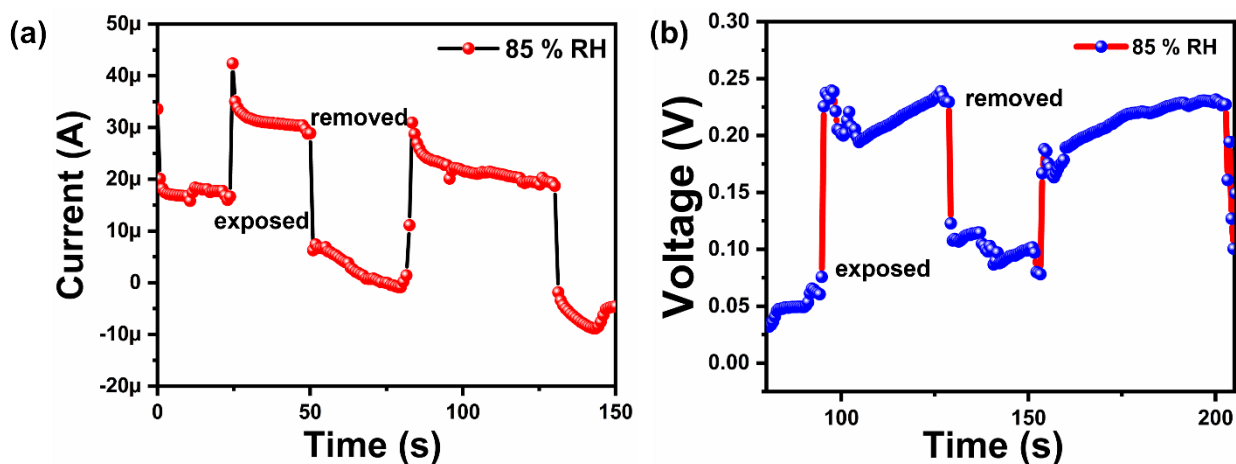

Fig.S10: (a) Current output was measured during sequential exposure and removal from the 85% RH;(b) Voltage output was measured during sequential exposure and removal from the 85% RH

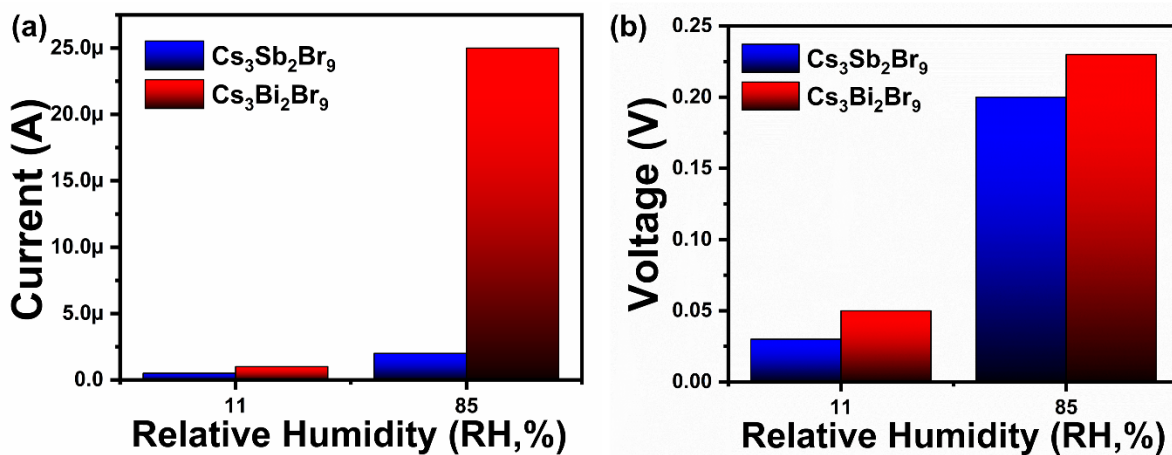

Fig.S11: I-t and V-t measurement of the  $\text{Cs}_3\text{Sb}_2\text{Br}_9$  and  $\text{Cs}_3\text{Bi}_2\text{Br}_9$  ionovoltaic device exposed to varying level of relative humidity

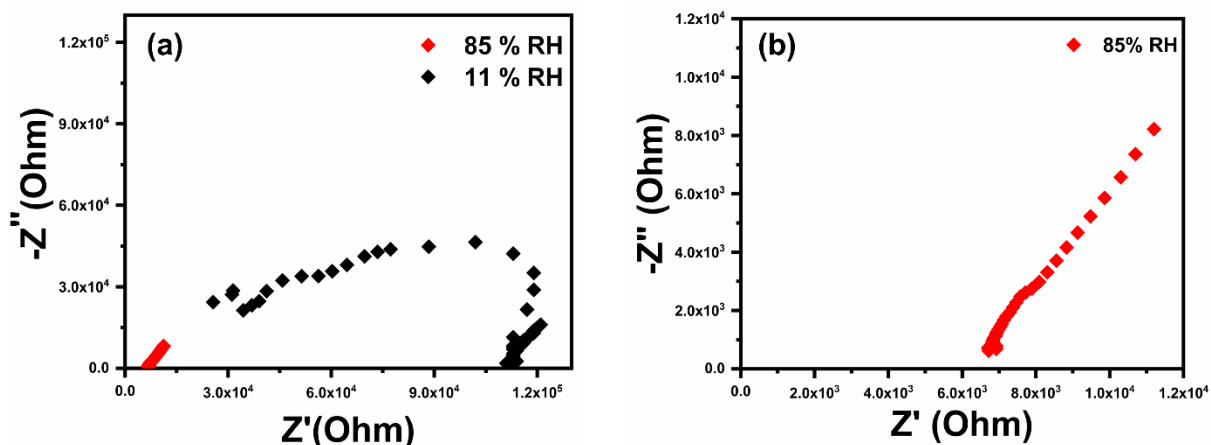

Fig.S12: (a) presents the Nyquist plots obtained for the ionovoltaic device when subjected to relative humidity level of 11% and 85%; (b) Zoomed image of 85 % RH

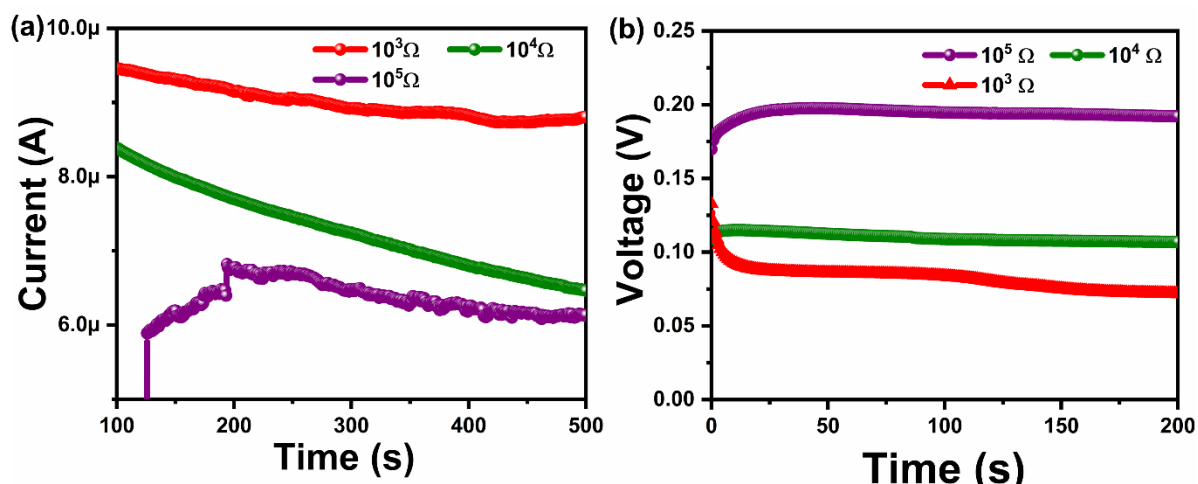

Fig.S13: (a) I-t measurement showing varying resistances; (b) V-t measurement illustrating varying resistances

Table 2: Power density calculation at 85% RH with varying resistance

| Resistance | $I_{sc}$ (A)         | $V_{oc}$ (V) | Area<br>( $1.5 \text{ cm} \times 0.2 \text{ cm} = 0.3 \text{ cm}^2$ ) | Current density<br>$J=I/A$<br>( $\mu\text{A}/\text{cm}^2$ ) | Power density<br>( $\mu\text{W}/\text{cm}^2$ ) |
|------------|----------------------|--------------|-----------------------------------------------------------------------|-------------------------------------------------------------|------------------------------------------------|
| $10^3$     | $9.5 \times 10^{-6}$ | 0.08         | 0.3                                                                   | 31                                                          | 2.53                                           |
| $10^4$     | $6.3 \times 10^{-6}$ | 0.108        | 0.3                                                                   | 21                                                          | 2.31                                           |
| $10^5$     | $6.1 \times 10^{-6}$ | 0.2          | 0.3                                                                   | 20                                                          | 4.09                                           |

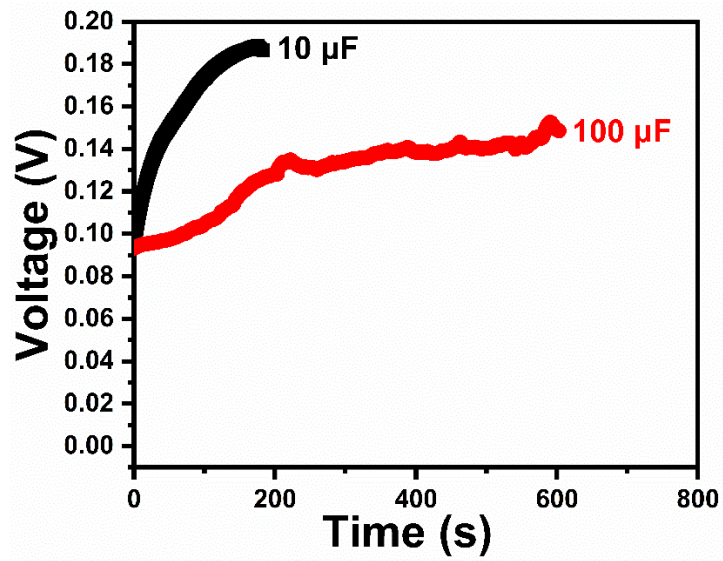

**Fig.S14: Illustrates the charging behavior of capacitors with capacitances of 10 µF and 100 µF using single ionovoltaic devices in an environment with 75% RH**
